# Supplementary material for: Kombucha: Production and Microbiological Research
Source: MDPI journal article supplement (doi:10.3390/foods11213456), 2022-10-31
Supplement: s1 [file s1]

## Supplementary materials

**Table S1** Commonly used media for the isolation, cultivation and differentiation of acetic acid bacteria.

| Medium                                                 | Components (g/L) or (mL/L)                                                                                                                                                                           | References |
|--------------------------------------------------------|------------------------------------------------------------------------------------------------------------------------------------------------------------------------------------------------------|------------|
| Glucose yeast extract carbonate (GYC)                  | Glucose (100), yeast extract (10), calcium carbonate (20), bacteriological agar (15)                                                                                                                 | [63,64,65] |
| Glucose yeast extract (GY)                             | Glucose (20), yeast extract (10), bacteriological agar (20)                                                                                                                                          | [60,66]    |
| Yeast extract Peptone Mannitol (YPM)                   | Yeast extract (5), mannitol (25), peptone (3), bacteriological agar (12)                                                                                                                             | [64]       |
| Malt yeast extract (MYA)                               | Malt extract (15), yeast extract (5), Bacteriological agar (15)                                                                                                                                      | [64,66]    |
| Reinforced Acetic acid ethanol (RAE)                   | Glucose (40), yeast extract (10), peptone (10), Na <sub>2</sub> PO <sub>4</sub> *2H <sub>2</sub> O (3.38), citric acid x H <sub>2</sub> O, ethanol (20), acetic acid (50), bacteriological agar (20) | [67]       |
| Basal medium ethanol (BME)                             | Yeast extract (0.5), vitamin-free casamino acids (3), ethanol (3), bacteriological agar (15)                                                                                                         | [68]       |
| Carr                                                   | Yeast extract (30), ethanol (20), bromocresol green (0.022), bacteriological agar (20)                                                                                                               | [69]       |
| Glucose yeast extract acetic acid ethanol (GYAE)       | Glucose (50), yeast extract (10), acetic acid (10), ethanol (20), bacteriological agar (15)                                                                                                          | [70]       |
| Glucose yeast extract ethanol calcium carbonate (GYEC) | Glucose (10), yeast extract (10), calcium carbonate (20), ethanol (30), bacteriological agar (15)                                                                                                    | [71]       |
| Glucose yeast extract peptone (GYP)                    | Glucose (30), yeast extract (5), peptone (2), bacteriological agar (15)                                                                                                                              | [72]       |
| Hestrin-Schramm (HS)                                   | Glucose (20), yeast extract (5), peptone (5), Na <sub>2</sub> HPO <sub>4</sub> (2.7).                                                                                                                | [73]       |
| Sorbitol yeast extract peptone (SYP)                   | Sorbitol (50), yeast extract (5), peptone (3), bacteriological agar (15)                                                                                                                             | [60]       |
| Yeast extract glucose mannitol (YGM)                   | Glucose (20), mannitol (20), yeast extract (10), acetic acid (5), ethanol (20)                                                                                                                       | [74]       |

**Table S2.** Commonly used media for the isolation, cultivation and differentiation of yeast from food products [77].

| Medium                                               | Component (g/L) or (mL/L)                                                                                                                                                                                                   |
|------------------------------------------------------|-----------------------------------------------------------------------------------------------------------------------------------------------------------------------------------------------------------------------------|
| Sabouraud glucose agar (SGA)                         | Glucose (10), Peptone (10) bacteriological agar (15)                                                                                                                                                                        |
| Potato dextrose agar (PDA)                           | Glucose (20), potato infusion (500), bacteriological agar (15)                                                                                                                                                              |
| Malt extract agar (MEA)                              | Malt extract (20), peptone (5), bacteriological agar (15)                                                                                                                                                                   |
| Acidified potato dextrose agar (APDA)                | Glucose (20), potato infusion (500), lactic acid solution (5), bacteriological agar (15)                                                                                                                                    |
| Acidified Tryptone glucose yeast extract agar (ATGY) | Tryptone (5), glucose (100), yeast extract (5), glacial acetic acid (10), bacteriological agar (15)                                                                                                                         |
| Oxytetracycline glucose yeast extract agar (OGY)     | Glucose (20), agar (12), yeast extract (5), oxytetracycline solution (10)                                                                                                                                                   |
| Yeast extract glucose chloramphenicol (YGC) agar     | Glucose (20), agar (14.9), yeast extract (5), Chloramphenicol (0.1)                                                                                                                                                         |
| Rose Bengal chloramphenicol agar (RBC)               | Glucose (10), Papaic digest of soybean meal (5), KH <sub>2</sub> PO <sub>4</sub> (1), MgSO <sub>4</sub> *7H <sub>2</sub> O (0.5), Rose Bengal (0.05), chloramphenicol solution (10)                                         |
| Dichloran Rose Bengal chloramphenicol agar (DRBC)    | Glucose (10), peptone (5), KH <sub>2</sub> PO <sub>4</sub> (1), MgSO <sub>4</sub> *7H <sub>2</sub> O (0.5), Rose Bengal (5% w/v, 0.5), chloramphenicol (0.1), dichloran (0.2% w/v in ethanol, 1), bacteriological agar (15) |
